# Supplementary material for: Predicting an optimal oxide/metal catalytic interface for hydrodeoxygenation chemistry of biomass derivatives
Source: Royal Society of Chemistry journal article supplement (doi:10.1039/d1cy00707f), 2021-01-01
Supplement: d1cy00707f1.pdf [file d1cy00707f1.pdf]

## Predicting an Optimal Oxide/Metal Catalytic Interface for Hydrodeoxygenation Chemistry of Biomass Derivatives

Shyam Deo<sup>\*</sup>, Michael J. Janik<sup>\*1</sup>

<sup>\*</sup>Department of Chemical Engineering, The Pennsylvania State University, University Park, Pennsylvania 16802, United States

<sup>1</sup>email: [mjj13@psu.edu](mailto:mjj13@psu.edu)

### Table of Contents

|                                                                                                                                                                                                                       |    |
|-----------------------------------------------------------------------------------------------------------------------------------------------------------------------------------------------------------------------|----|
| S1. Surface Models .....                                                                                                                                                                                              | 2  |
| S2. Table of Catalytic Descriptors .....                                                                                                                                                                              | 3  |
| S3. Correlation between Catalytic Descriptors .....                                                                                                                                                                   | 5  |
| S4. Energetics for the Dissociative Stability of the Deoxygenation Step .....                                                                                                                                         | 7  |
| S5. Bader charge density difference plots for the C-O activation TS across the TiO <sub>2</sub> /M (111) interface model surfaces.....                                                                                | 9  |
| S6. C-H Formation Energetics to the Final Product Methylfuran .....                                                                                                                                                   | 10 |
| S7. Dissociative Hydrogen Activation Energetics .....                                                                                                                                                                 | 11 |
| S8. Correlation of Various Energetics with the Catalytic Descriptors.....                                                                                                                                             | 12 |
| S9. Initial state (IS), transition state (TS) and final state (FS) structures for HDO catalytic steps across the TiO <sub>2</sub> /M (111) and the TiO <sub>2</sub> /M <sub>ML</sub> -Pd (111) interface models. .... | 17 |
| S10. HDO Kinetic Analysis.....                                                                                                                                                                                        | 30 |

## S1. Surface Models

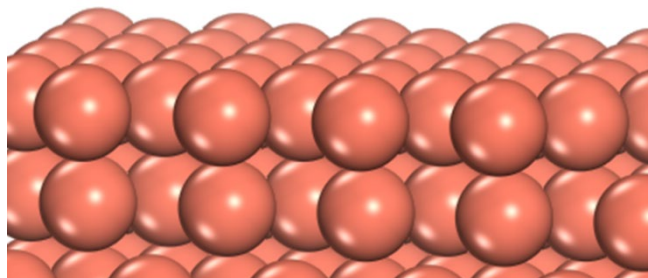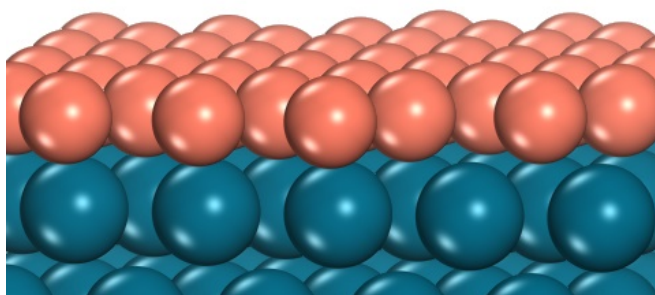

**Figure S1.** a) Bare Metal surface, M (111) Model and b) Metal Monolayer over Pd (111) surface,  $M_{ML}$ -Pd (111) Model. Color code: Peach color represents a generalized metal M, and dark cyan color represents Pd metal.

## S2. Table of Catalytic Descriptors

**Table S1.** The values of catalytic descriptors work function ( $\Phi$ ), oxygen vacancy formation energy ( $\Delta E_{\text{vac}}$ ), metal-carbon binding energy (M-C<sub>B.E.</sub>), and the extent of charge transfer (q) across the interface models. The orange data points represent TiO<sub>2</sub>/M (111) interface models and blue data points represent TiO<sub>2</sub>/M<sub>ML</sub>-Pd(111) models where the metals, M forming these interface are indicated.

| S.No. | Metal, M | $\Delta E_{\text{vac}}$ (eV) | M-C <sub>B.E.</sub> (eV) | $\Phi$ (eV) | q (e <sup>-</sup> ) |
|-------|----------|------------------------------|--------------------------|-------------|---------------------|
| 1     | Ag       | 3.96                         | -3.52                    | 4.55        | 0.15                |
| 2     | Au       | 3.52                         | -4.18                    | 5.27        | -0.67               |
| 3     | Cu       | 4.00                         | -6.50                    | 4.46        | 1.03                |
| 4     | Rh       | 3.47                         | -7.62                    | 4.99        | -0.08               |
| 5     | Ru       | 3.95                         | -8.00                    | 4.94        | 0.42                |
| 6     | Zn       | 3.79                         | -5.69                    | 4.24        | 1.06                |
| 7     | Pd       | 3.04                         | -7.17                    | 5.20        | -0.53               |
| 8     | Ag       | 4.35                         | -3.50                    | 4.76        | 0.18                |
| 9     | Au       | 3.71                         | -4.22                    | 5.07        | -0.64               |
| 10    | Co       | 4.37                         | -6.40                    | 4.25        | 1.58                |
| 11    | Cu       | 4.30                         | -6.90                    | 4.69        | 0.91                |
| 12    | Fe       | 4.23                         | -5.82                    | 4.21        | 2.50                |
| 13    | Ir       | 2.37                         | -8.41                    | 5.89        | -0.59               |
| 14    | Ni       | 4.15                         | -5.33                    | 3.98        | 1.01                |
| 15    | Pt       | 2.43                         | -7.62                    | 5.60        | -0.83               |
| 16    | Rh       | 3.27                         | -8.11                    | 5.33        | -0.11               |
| 17    | Ru       | 3.17                         | -8.52                    | 5.24        | 0.21                |
| 18    | Zn       | 3.74                         | -4.68                    | 4.38        | 1.33                |

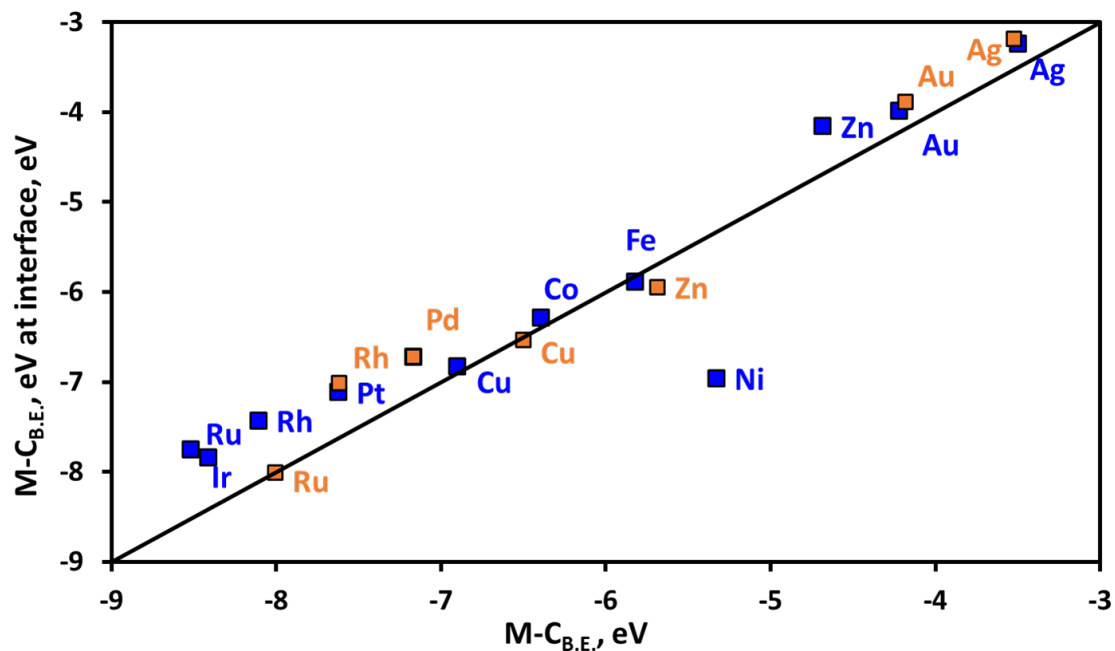

**Figure S2.** The strong positive correlation of metal carbon-binding energies,  $M-C_{B.E.}$  at an interfacial surface vs  $M-C_{B.E.}$  over bare  $M(111)$  and  $M_{ML}-Pd(111)$  surfaces ( $R^2 = 0.86$ ). A parity line is also shown to indicate the deviation between the x and y axis values (mean absolute deviation = 0.41 eV). Orange data points represent  $TiO_2/M(111)$  interface models and blue data points represent  $TiO_2/M_{ML}-Pd(111)$  models.

### **S3. Correlation between Catalytic Descriptors**

#### **Pearson correlation coefficient, $\rho$**

Pearson's correlation coefficient is defined as the covariance of two variables  $X$  and  $Y$  divided by the product of their standard deviations. The correlation coefficient ranges from  $-1$  to  $1$ . A value of  $1$  implies a perfect linear relationship between  $X$  and  $Y$ , with all data points lying on a line such that  $Y$  increases as  $X$  increases. Similarly, a value of  $-1$  implies that all data points lie on a line for which  $Y$  decreases as  $X$  increases. A value of  $0$  implies that there is no linear correlation between the variables. In addition, either tendency is stronger when the absolute value of the correlation coefficient is larger (for values in between  $-1$  and  $1$ ).

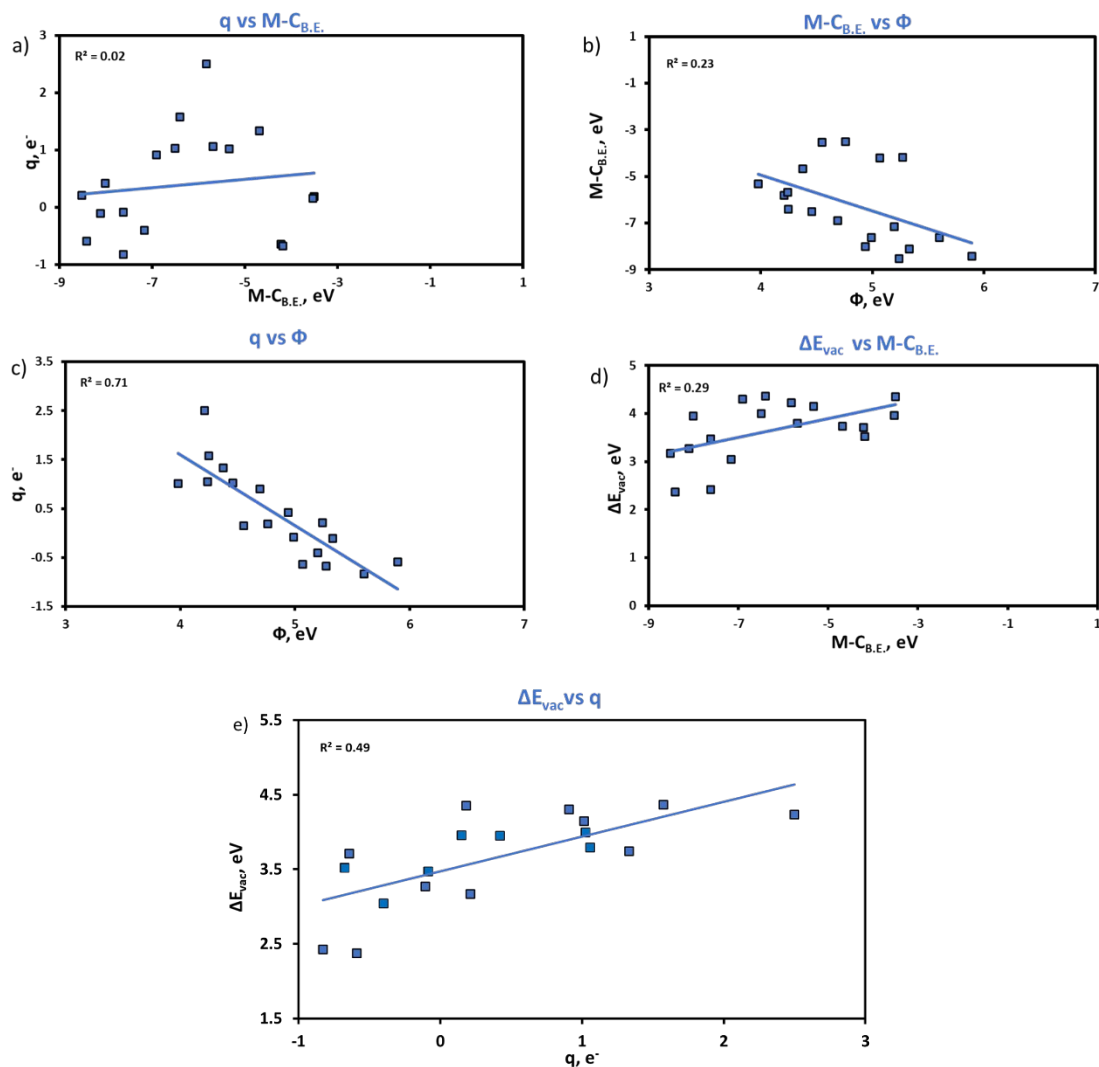

**Figure S3.** (a-e) Interdependency between the catalytic descriptors work function ( $\Phi$ ), oxygen vacancy formation energy ( $\Delta E_{vac}$ ), metal-carbon binding energy ( $M-C_{B.E.}$ ), and the extent of charge transfer ( $q$ ) shown by each descriptor plotted against the others. Oxygen vacancy formation energy of the interfacial model,  $\Delta E_{vac}$  is already plotted against the metal work function,  $\Phi$  in **Figure 8**.

#### S4. Energetics for the Dissociative Stability of the Deoxygenation Step

**Table S2.** Dependence of  $\Delta E_{TS-DDO}$ , TS stability for the C-O activation step, S2 (DDO) with respect to bare O deficient surface interface ( $TiO_{2-x}$  and gas phase furfuryl alcohol) as defined in equation 5 and the corresponding mean absolute errors (MAE) in eV.

| S. No. | Governing dependence on descriptors (standardized)                                                            | R <sup>2</sup> | MAE (eV) |
|--------|---------------------------------------------------------------------------------------------------------------|----------------|----------|
| 1      | $\Delta E_{TS-DDO} = -1.79 + 0.39 \times O_{vac}$                                                             | 0.57           | 0.27     |
| 2      | $\Delta E_{TS-DDO} = -1.79 + 0.24 \times M-C_{B.E.}$                                                          | 0.22           | 0.37     |
| 3      | $\Delta E_{TS-DDO} = -1.79 - 0.48 \times \Phi$                                                                | 0.85           | 0.15     |
| 4      | $\Delta E_{TS-DDO} = -1.79 + 0.46 \times q$                                                                   | 0.77           | 0.21     |
| 5      | $\Delta E_{TS-DDO} = -1.79 + 0.37 \times O_{vac} + 0.04 \times M-C_{B.E.}$                                    | 0.58           | 0.27     |
| 6      | $\Delta E_{TS-DDO} = -1.79 - 0.04 \times O_{vac} - 0.52 \times \Phi$                                          | 0.85           | 0.15     |
| 7      | $\Delta E_{TS-DDO} = -1.79 + 0.14 \times O_{vac} + 0.36 \times q$                                             | 0.81           | 0.21     |
| 8      | $\Delta E_{TS-DDO} = -1.79 + 0.01 \times M-C_{B.E.} - 0.47 \times \Phi$                                       | 0.85           | 0.15     |
| 9      | $\Delta E_{TS-DDO} = -1.79 + 0.17 \times M-C_{B.E.} + 0.43 \times q$                                          | 0.88           | 0.13     |
| 10     | $\Delta E_{TS-DDO} = -1.79 - 0.33 \times \Phi + 0.18 \times q$                                                | 0.88           | 0.15     |
| 11     | $\Delta E_{TS-DDO} = -1.79 - 0.05 \times O_{vac} + 0.02 \times M-C_{B.E.} - 0.51 \times \Phi$                 | 0.85           | 0.15     |
| 12     | $\Delta E_{TS-DDO} = -1.79 - 0.03 \times O_{vac} + 0.19 \times M-C_{B.E.} + 0.45 \times q$                    | 0.88           | 0.13     |
| 13     | $\Delta E_{TS-DDO} = -1.79 - 0.04 \times O_{vac} - 0.36 \times \Phi + 0.18 \times q$                          | 0.89           | 0.15     |
| 14     | $\Delta E_{TS-DDO} = -1.79 + 0.10 \times M-C_{B.E.} - 0.20 \times \Phi + 0.27 \times q$                       | 0.90           | 0.13     |
| 15     | $\Delta E_{TS-DDO} = -1.79 - 0.10 \times O_{vac} + 0.13 \times M-C_{B.E.} - 0.25 \times \Phi + 0.30 \times q$ | 0.91           | 0.12     |

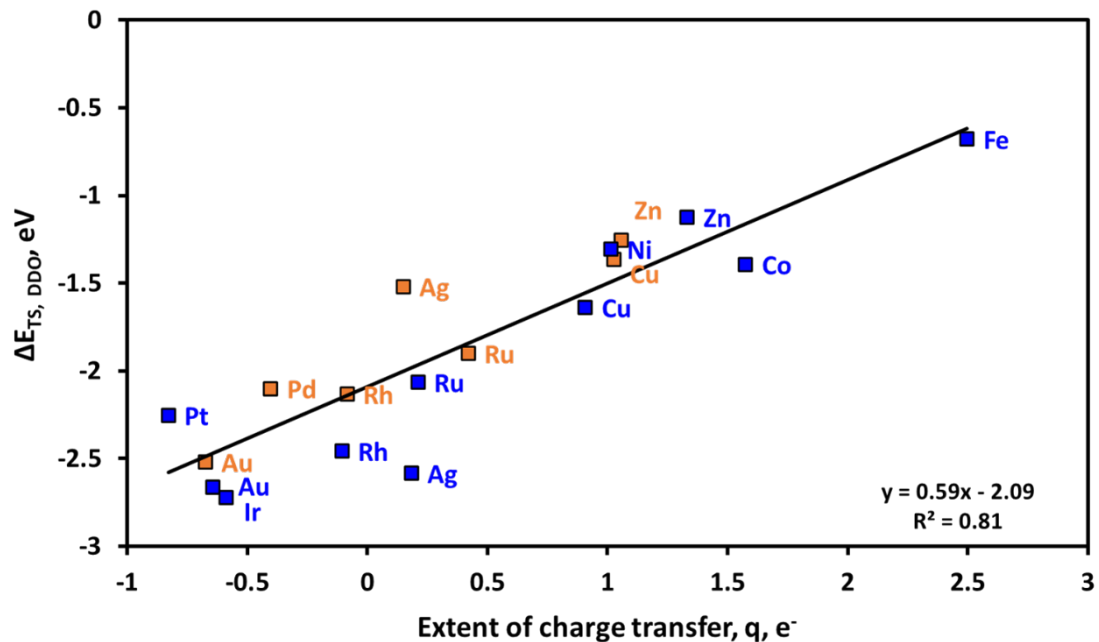

**Figure S4.** The gas phase stability of the TS state for C-O activation,  $\Delta E_{TS, DDO}$  vs the extent of charge transfer,  $q$ . Orange data points represent  $TiO_2/M$  (111) interface models and blue data points represent  $TiO_2/M_{ML}$ -Pd(111) models.



**S5. Bader charge density difference plots for the C-O activation TS across the TiO<sub>2</sub>/M (111) interface model surfaces**

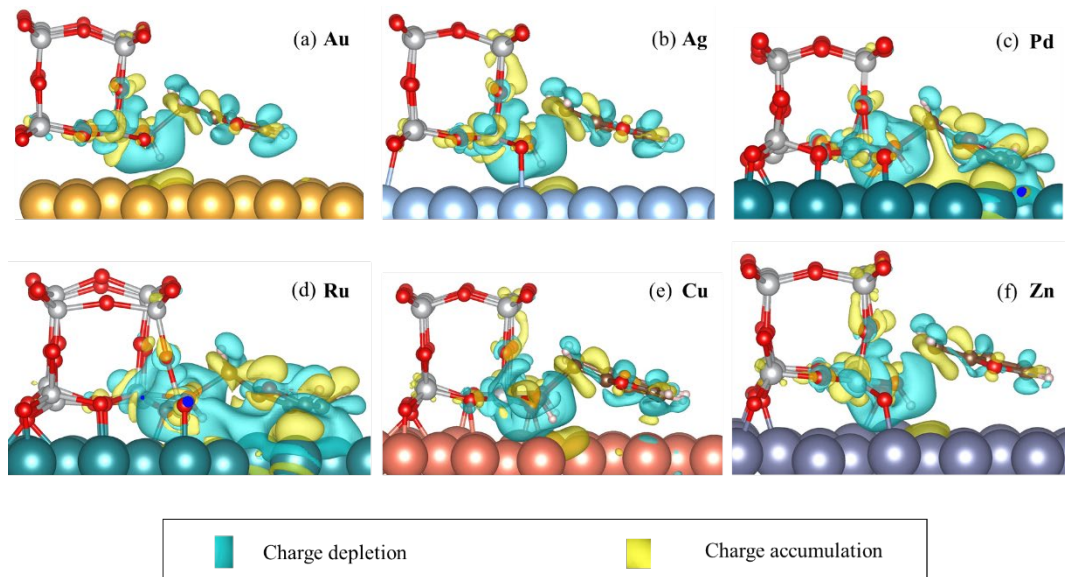

**Figure S5.** A Bader charge density difference plot during the C-O activation TS over the TiO<sub>2</sub>-M (111) interface models where M stands for a) Au, b) Ag, c) Pd, d) Ru, e) Cu and f) Zn. The isosurface level is 0.0013 e Bohr<sup>-3</sup>. The charge density difference plot is generated through the difference of charge between the DDO transition state structure and separate single-point calculations of the interface and hydrocarbon moieties in the TS structure. The light cyan and yellow colors indicate charge depletion and accumulation, respectively. The Bader charge density difference plot for TiO<sub>2</sub>/Rh (111) model surface is already included in **Figure 5b**.

## S6. C-H Formation Energetics to the Final Product Methylfuran

**Table S3.** Dependence of  $\Delta E_{\text{TS-C-H}}$ , TS stability for the C-H formation step, S3 relative to bare interface surface ( $\text{TiO}_2/\text{Metal}$  and gas phase furfuryl alcohol) as defined in equation 6 and the corresponding mean absolute errors (MAE) in eV.

| S. No. | Governing dependence on descriptors (standardized)                                                                                        | R <sup>2</sup> | MAE (eV) |
|--------|-------------------------------------------------------------------------------------------------------------------------------------------|----------------|----------|
| 1      | $\Delta E_{\text{TS-C-H}} = -1.49 + 0.68 \times O_{\text{vac}}$                                                                           | 0.45           | 0.62     |
| 2      | $\Delta E_{\text{TS-C-H}} = -1.49 + 0.93 \times \text{M-C}_{\text{B.E.}}$                                                                 | 0.86           | 0.30     |
| 3      | $\Delta E_{\text{TS-C-H}} = -1.49 - 0.67 \times \Phi$                                                                                     | 0.44           | 0.60     |
| 4      | $\Delta E_{\text{TS-C-H}} = -1.49 + 0.40 \times q$                                                                                        | 0.16           | 0.75     |
| 5      | $\Delta E_{\text{TS-C-H}} = -1.49 + 0.23 \times O_{\text{vac}} + 0.81 \times \text{M-C}_{\text{B.E.}}$                                    | 0.90           | 0.23     |
| 6      | $\Delta E_{\text{TS-C-H}} = -1.49 + 0.39 \times O_{\text{vac}} - 0.33 \times \Phi$                                                        | 0.49           | 0.60     |
| 7      | $\Delta E_{\text{TS-C-H}} = -1.49 + 0.79 \times O_{\text{vac}} - 0.16 \times q$                                                           | 0.47           | 0.61     |
| 8      | $\Delta E_{\text{TS-C-H}} = -1.49 + 0.80 \times \text{M-C}_{\text{B.E.}} - 0.27 \times \Phi$                                              | 0.92           | 0.22     |
| 9      | $\Delta E_{\text{TS-C-H}} = -1.49 + 0.89 \times \text{M-C}_{\text{B.E.}} + 0.26 \times q$                                                 | 0.93           | 0.22     |
| 10     | $\Delta E_{\text{TS-C-H}} = -1.49 - 1.15 \times \Phi - 0.57 \times q$                                                                     | 0.53           | 0.59     |
| 11     | $\Delta E_{\text{TS-C-H}} = -1.49 + 0.02 \times O_{\text{vac}} + 0.80 \times \text{M-C}_{\text{B.E.}} - 0.26 \times \Phi$                 | 0.92           | 0.22     |
| 12     | $\Delta E_{\text{TS-C-H}} = -1.49 + 0.00 \times O_{\text{vac}} + 0.89 \times \text{M-C}_{\text{B.E.}} + 0.26 \times q$                    | 0.93           | 0.22     |
| 13     | $\Delta E_{\text{TS-C-H}} = -1.49 + 0.40 \times O_{\text{vac}} - 0.82 \times \Phi - 0.57 \times q$                                        | 0.58           | 0.58     |
| 14     | $\Delta E_{\text{TS-C-H}} = -1.49 + 0.87 \times \text{M-C}_{\text{B.E.}} - 0.06 \times \Phi + 0.21 \times q$                              | 0.93           | 0.22     |
| 15     | $\Delta E_{\text{TS-C-H}} = -1.49 - 0.02 \times O_{\text{vac}} + 0.88 \times \text{M-C}_{\text{B.E.}} - 0.07 \times \Phi + 0.22 \times q$ | 0.93           | 0.22     |

## S7. Dissociative Hydrogen Activation Energetics

**Table S4.** Dependence of  $\Delta E_{2H-diss}$ , the dissociative adsorption energy of  $H_2$  relative to bare interface surface ( $TiO_2$ /Metal and gas phase hydrogen) as defined in equation 7 and the corresponding mean absolute errors (MAE) in eV.

| S. No. | Governing dependence on descriptors (standardized)                                                            | R <sup>2</sup> | MAE (eV) |
|--------|---------------------------------------------------------------------------------------------------------------|----------------|----------|
| 1      | $\Delta E_{2H-diss} = -0.53 + 0.31 \times O_{vac}$                                                            | 0.39           | 0.31     |
| 2      | $\Delta E_{2H-diss} = -0.53 + 0.21 \times M-C_{B.E.}$                                                         | 0.18           | 0.37     |
| 3      | $\Delta E_{2H-diss} = -0.53 - 0.38 \times \Phi$                                                               | 0.60           | 0.28     |
| 4      | $\Delta E_{2H-diss} = -0.53 + 0.34 \times q$                                                                  | 0.48           | 0.31     |
| 5      | $\Delta E_{2H-diss} = -0.53 + 0.28 \times O_{vac} + 0.05 \times M-C_{B.E.}$                                   | 0.40           | 0.30     |
| 6      | $\Delta E_{2H-diss} = -0.53 - 0.05 \times O_{vac} - 0.42 \times \Phi$                                         | 0.60           | 0.27     |
| 7      | $\Delta E_{2H-diss} = -0.53 + 0.13 \times O_{vac} + 0.25 \times q$                                            | 0.52           | 0.29     |
| 8      | $\Delta E_{2H-diss} = -0.53 + 0.03 \times M-C_{B.E.} - 0.36 \times \Phi$                                      | 0.60           | 0.27     |
| 9      | $\Delta E_{2H-diss} = -0.53 + 0.16 \times M-C_{B.E.} + 0.31 \times q$                                         | 0.58           | 0.28     |
| 10     | $\Delta E_{2H-diss} = -0.53 - 0.32 \times \Phi + 0.07 \times q$                                               | 0.60           | 0.28     |
| 11     | $\Delta E_{2H-diss} = -0.53 - 0.07 \times O_{vac} + 0.04 \times M-C_{B.E.} - 0.42 \times \Phi$                | 0.60           | 0.27     |
| 12     | $\Delta E_{2H-diss} = -0.53 - 0.02 \times O_{vac} + 0.16 \times M-C_{B.E.} + 0.33 \times q$                   | 0.58           | 0.28     |
| 13     | $\Delta E_{2H-diss} = -0.53 - 0.05 \times O_{vac} - 0.36 \times \Phi + 0.07 \times q$                         | 0.61           | 0.27     |
| 14     | $\Delta E_{2H-diss} = -0.53 + 0.07 \times M-C_{B.E.} - 0.23 \times \Phi + 0.14 \times q$                      | 0.61           | 0.27     |
| 15     | $\Delta E_{2H-diss} = -0.53 - 0.09 \times O_{vac} + 0.1 \times M-C_{B.E.} - 0.28 \times \Phi + 0.16 \times q$ | 0.62           | 0.27     |

## S8. Correlation of Various Energetics with the Catalytic Descriptors

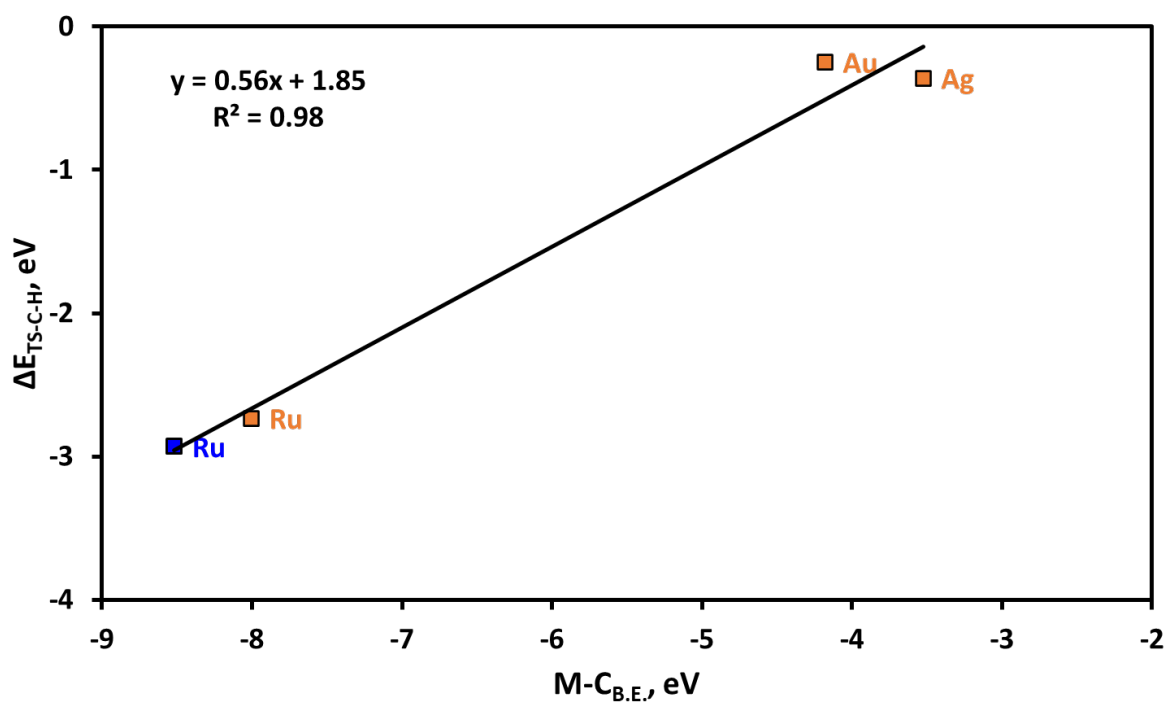

**Figure S6.** The stability of C-H formation transition state (with O vacancy present at the interface),  $\Delta E_{TS-C-H}$ , is plotted versus the metal carbon binding strength,  $M-C_{B.E.}$ . Orange data points represent  $TiO_2/M(111)$  interface models and blue data point represents  $TiO_2/M_{ML}-Pd(111)$  model.

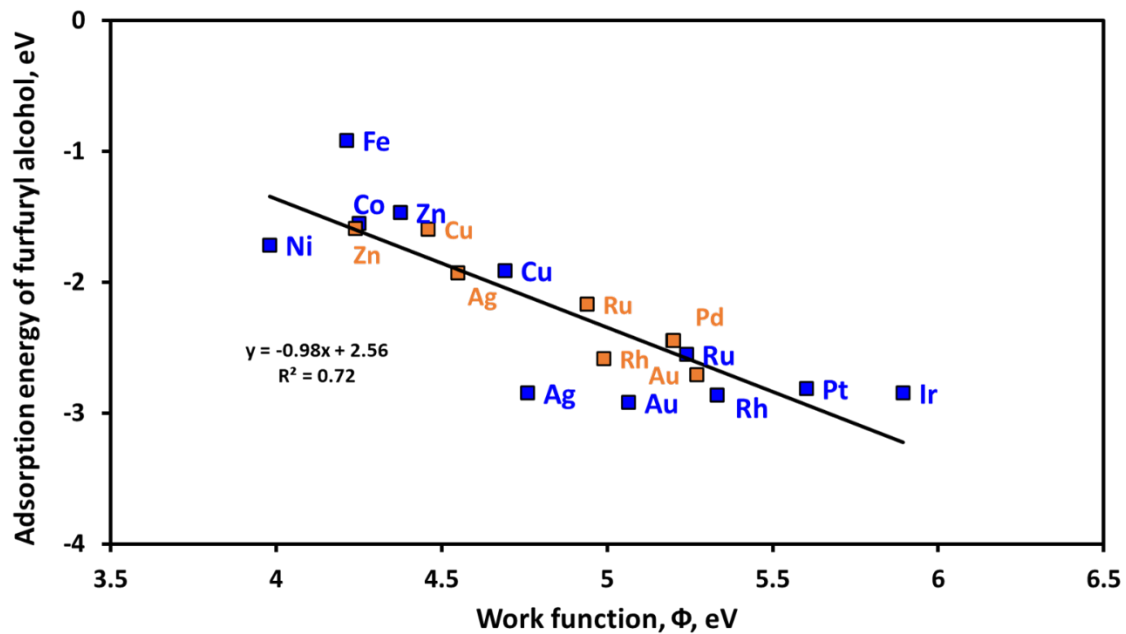

**Figure S7.** The strong correlation of the adsorption energy of furfuryl alcohol over an interfacial vacancy (initial state (IS) for C-O activation) vs metal workfunction,  $\Phi$ . Orange data points represent  $\text{TiO}_2/\text{M} (111)$  interface models and blue data points represent  $\text{TiO}_2/\text{M}_{\text{ML}}\text{-Pd}(111)$  models.

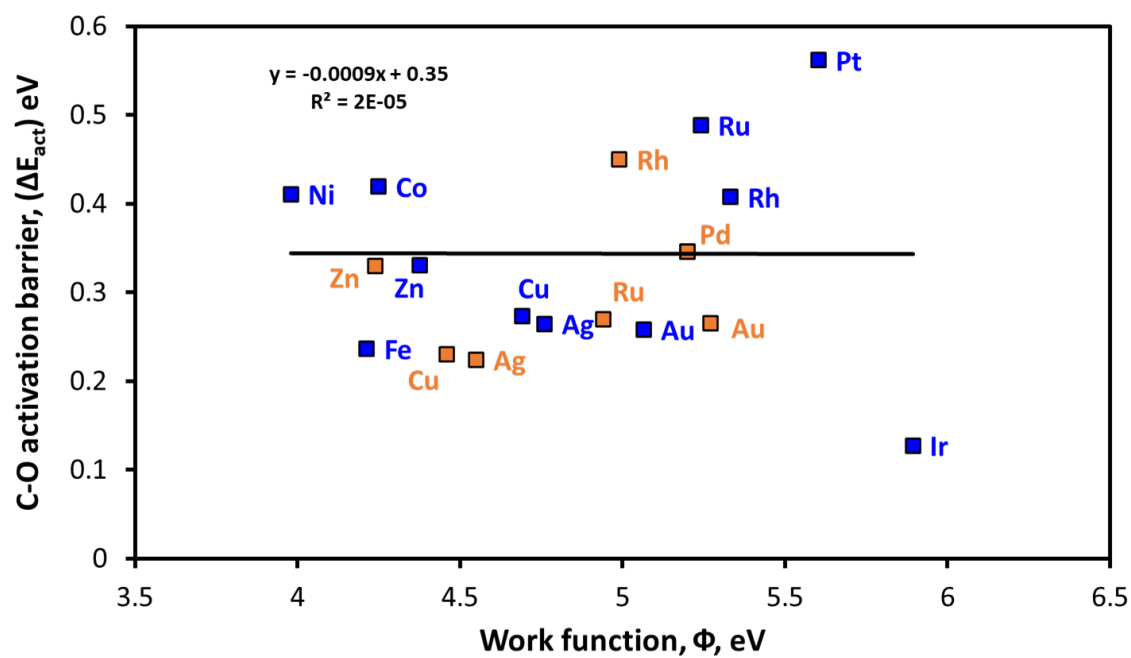

**Figure S8.** The activation barrier for C-O activation (DDO),  $\Delta E_{act}$  vs metal workfunction,  $\Phi$ . Orange data points represent  $\text{TiO}_2/\text{M}$  (111) interface models and blue data points represent  $\text{TiO}_2/\text{M}_{\text{ML}}\text{-Pd}(111)$  models.

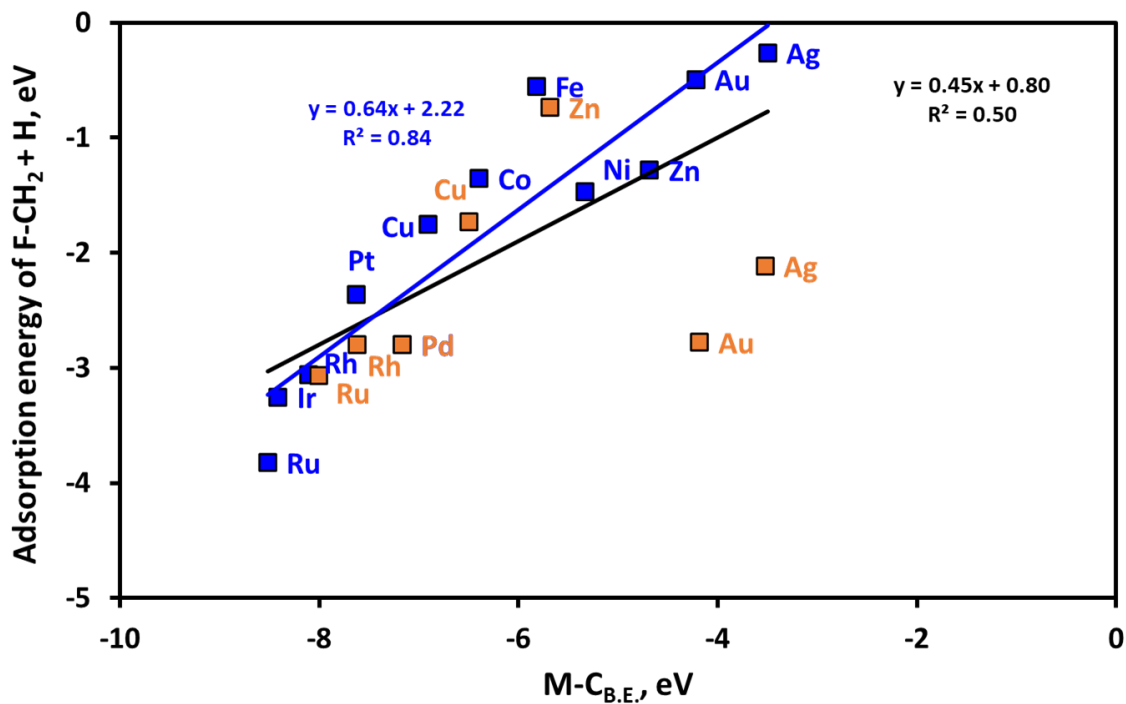

**Figure S9.** The correlations of the adsorption energy of the F-CH<sub>2</sub> + H state over an interfacial vacancy (initial state (IS) for C-H formation) vs metal-carbon binding energy, M-C<sub>B.E.</sub>. F stands for furanic ring. Orange data points represent TiO<sub>2</sub>/M (111) interface models and blue data points represent TiO<sub>2</sub>/M<sub>ML</sub>-Pd (111) models. The linear trend (black) shows the combined correlation for the TiO<sub>2</sub>/M (111) and the TiO<sub>2</sub>/M<sub>ML</sub>-Pd (111) interface models, while the linear trend (blue) shows the correlation for the TiO<sub>2</sub>/M<sub>ML</sub>-Pd (111) interface models only.

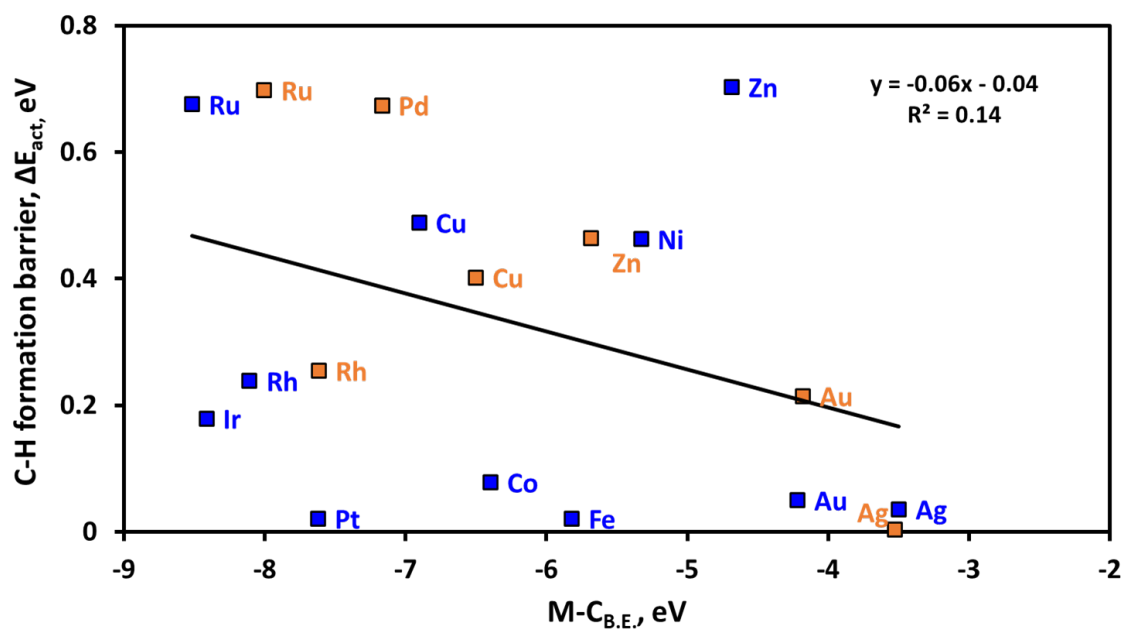

**Figure S10.** The activation barrier for C-H formation,  $\Delta E_{act}$  vs metal-carbon binding energy,  $M-C_{B.E.}$ . Orange data points represent  $TiO_2/M$  (111) interface models and blue data points represent  $TiO_2/M_{ML}$ -Pd(111) models.



**S9. Initial state (IS), transition state (TS) and final state (FS) structures for HDO catalytic steps across the  $\text{TiO}_2/\text{M}$  (111) and the  $\text{TiO}_2/\text{M}_{\text{ML}}\text{-Pd}$  (111) interface models.**

**Table S5.** Initial state (IS), transition state (TS) and final state (FS) structures for the C-O activation step across the  $\text{TiO}_2/\text{M}$  (111) and the  $\text{TiO}_2/\text{M}_{\text{ML}}\text{-Pd}$  (111) interface models. Color code: gray represents Ti, dark grey represents C, white represents H, red represents O and the fifth color shade represents the metal surface M.

| Interface Model                   | IS                                                                                  | TS                                                                                   | FS                                                                                    |
|-----------------------------------|-------------------------------------------------------------------------------------|--------------------------------------------------------------------------------------|---------------------------------------------------------------------------------------|
| $\text{TiO}_2/\text{Ag}$<br>(111) | 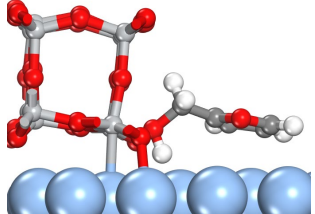   |    |    |
| $\text{TiO}_2/\text{Au}$<br>(111) |   |   |   |
| $\text{TiO}_2/\text{Cu}$<br>(111) |  |  |  |
| $\text{TiO}_2/\text{Pd}$<br>(111) |  |  |  |

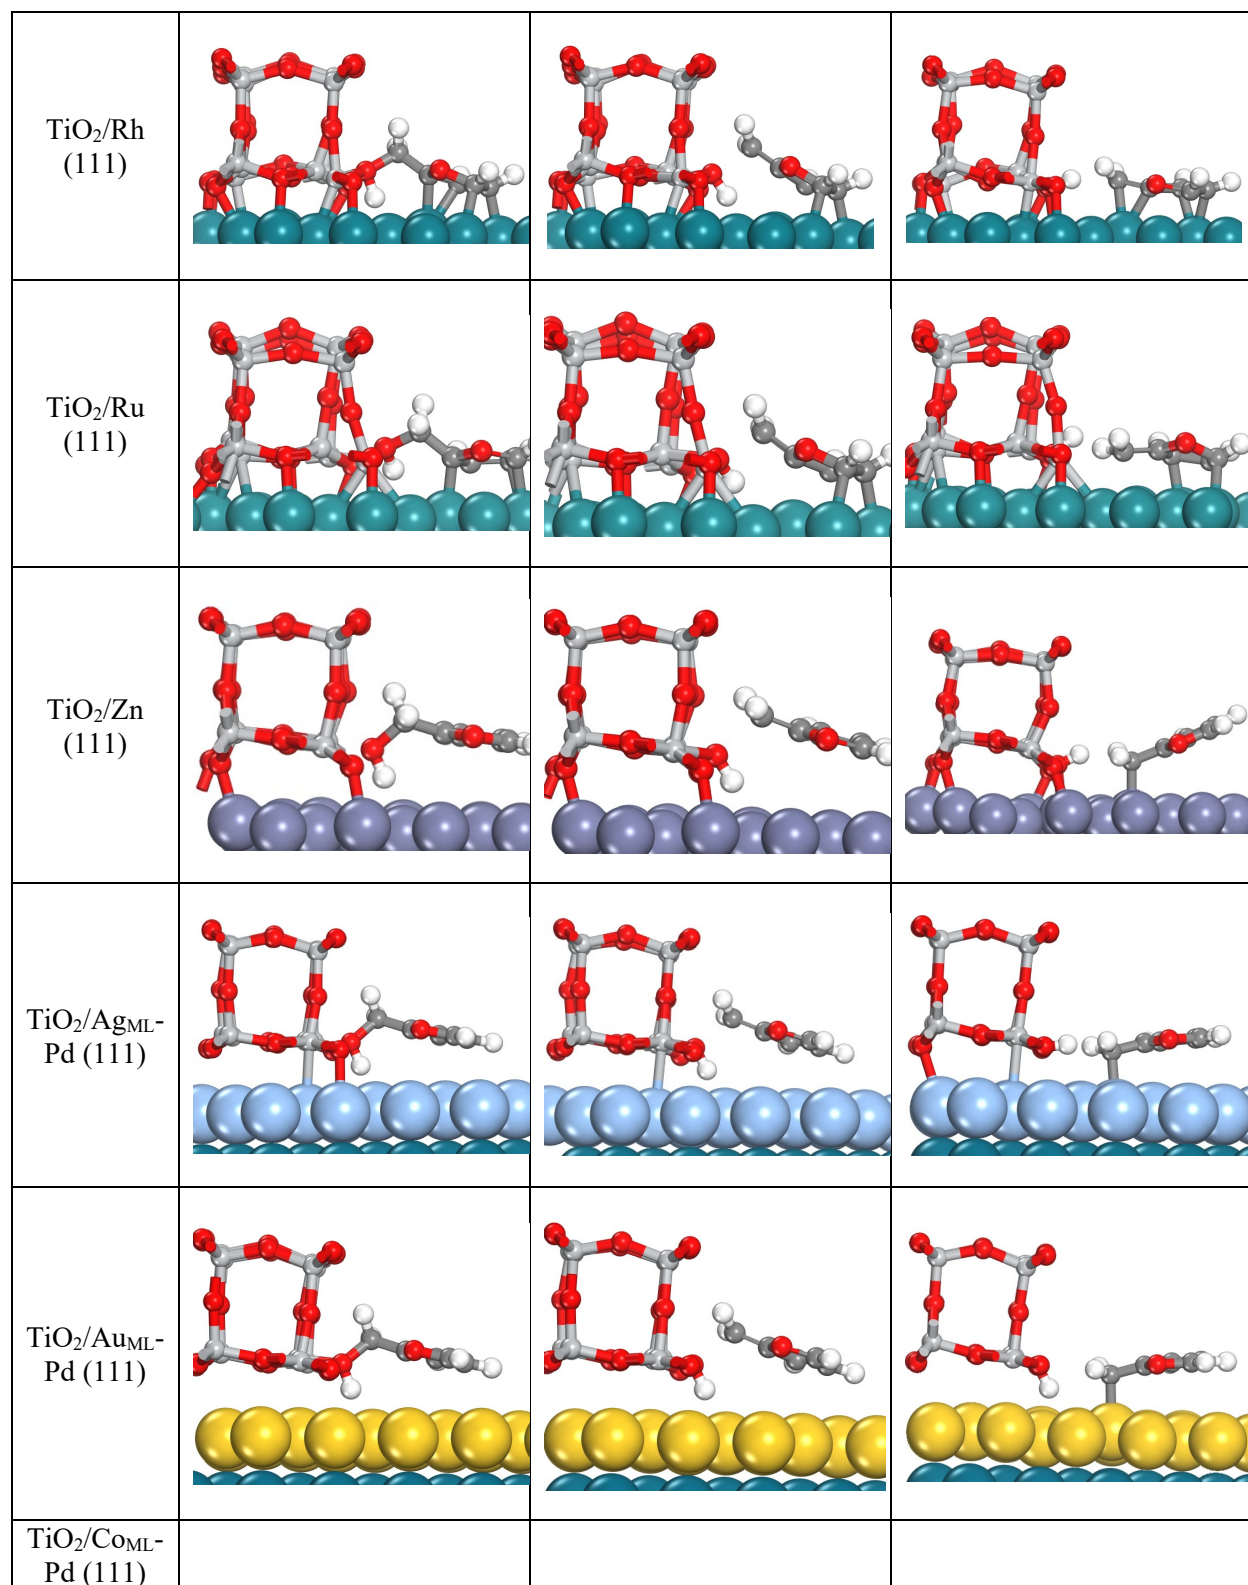

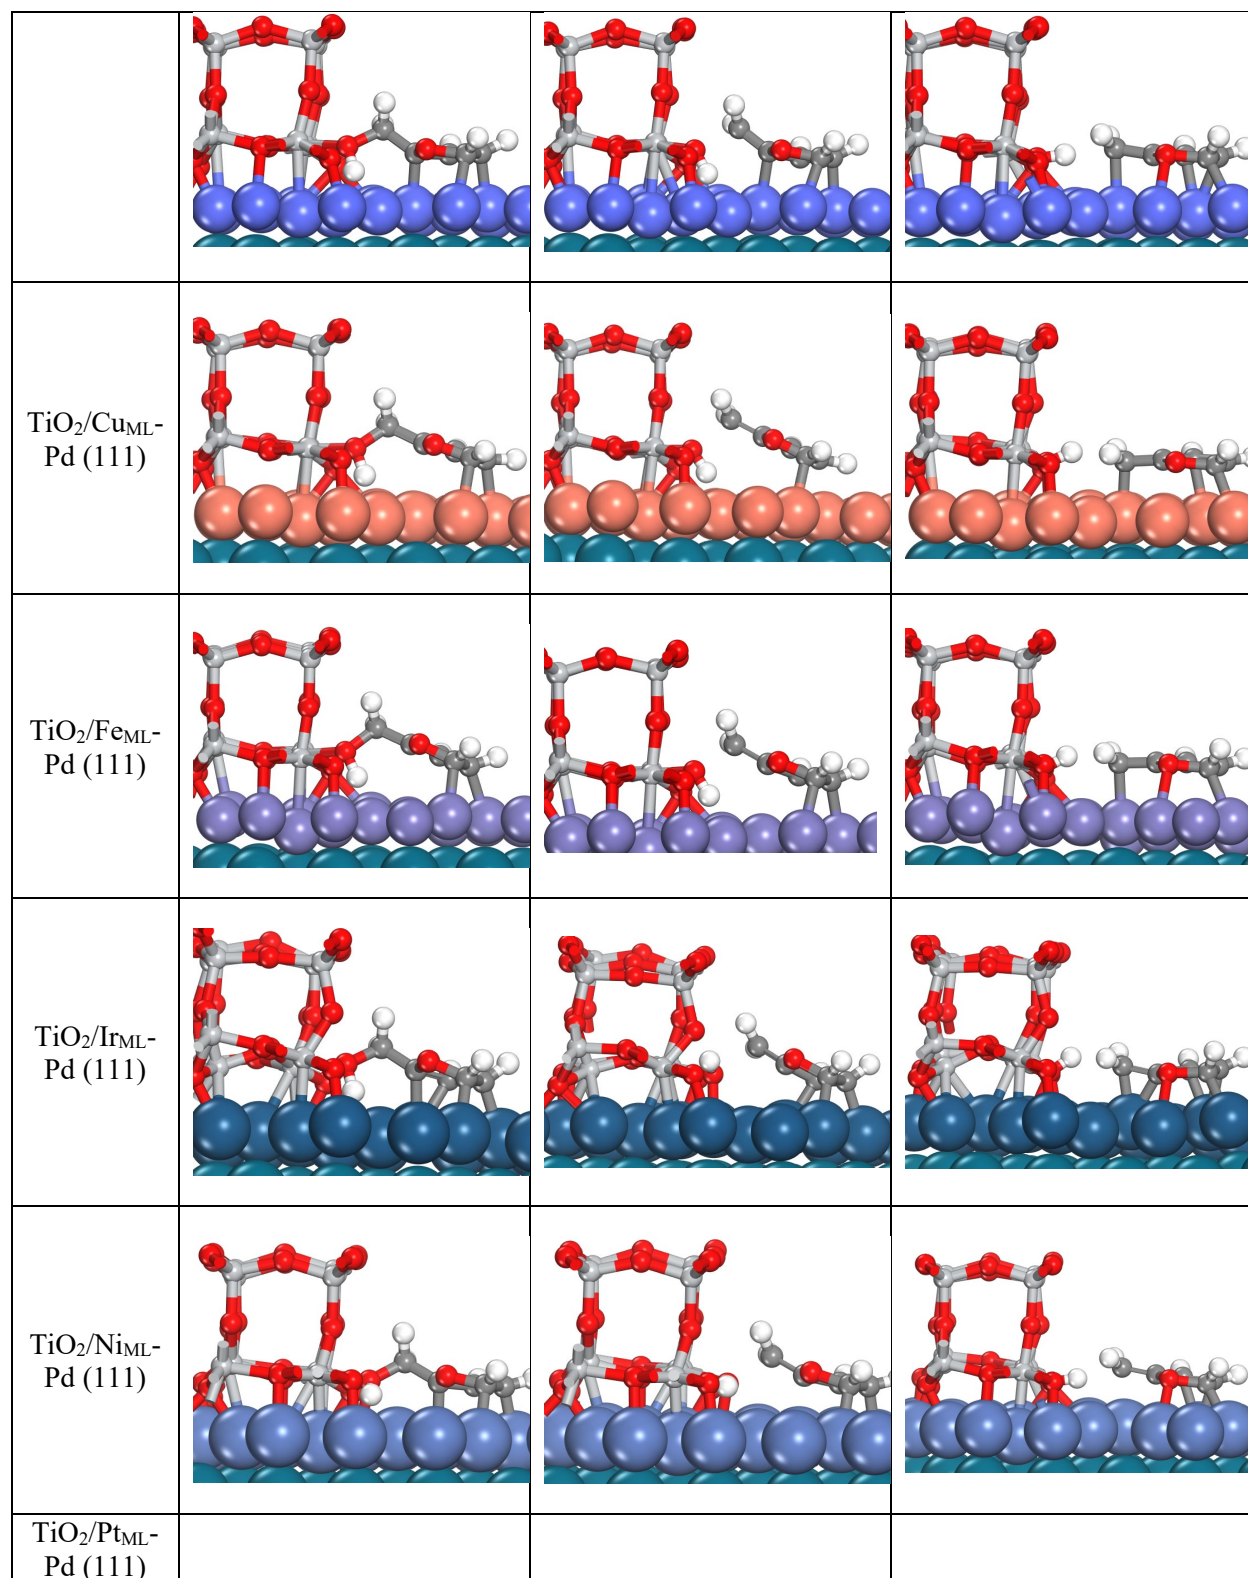



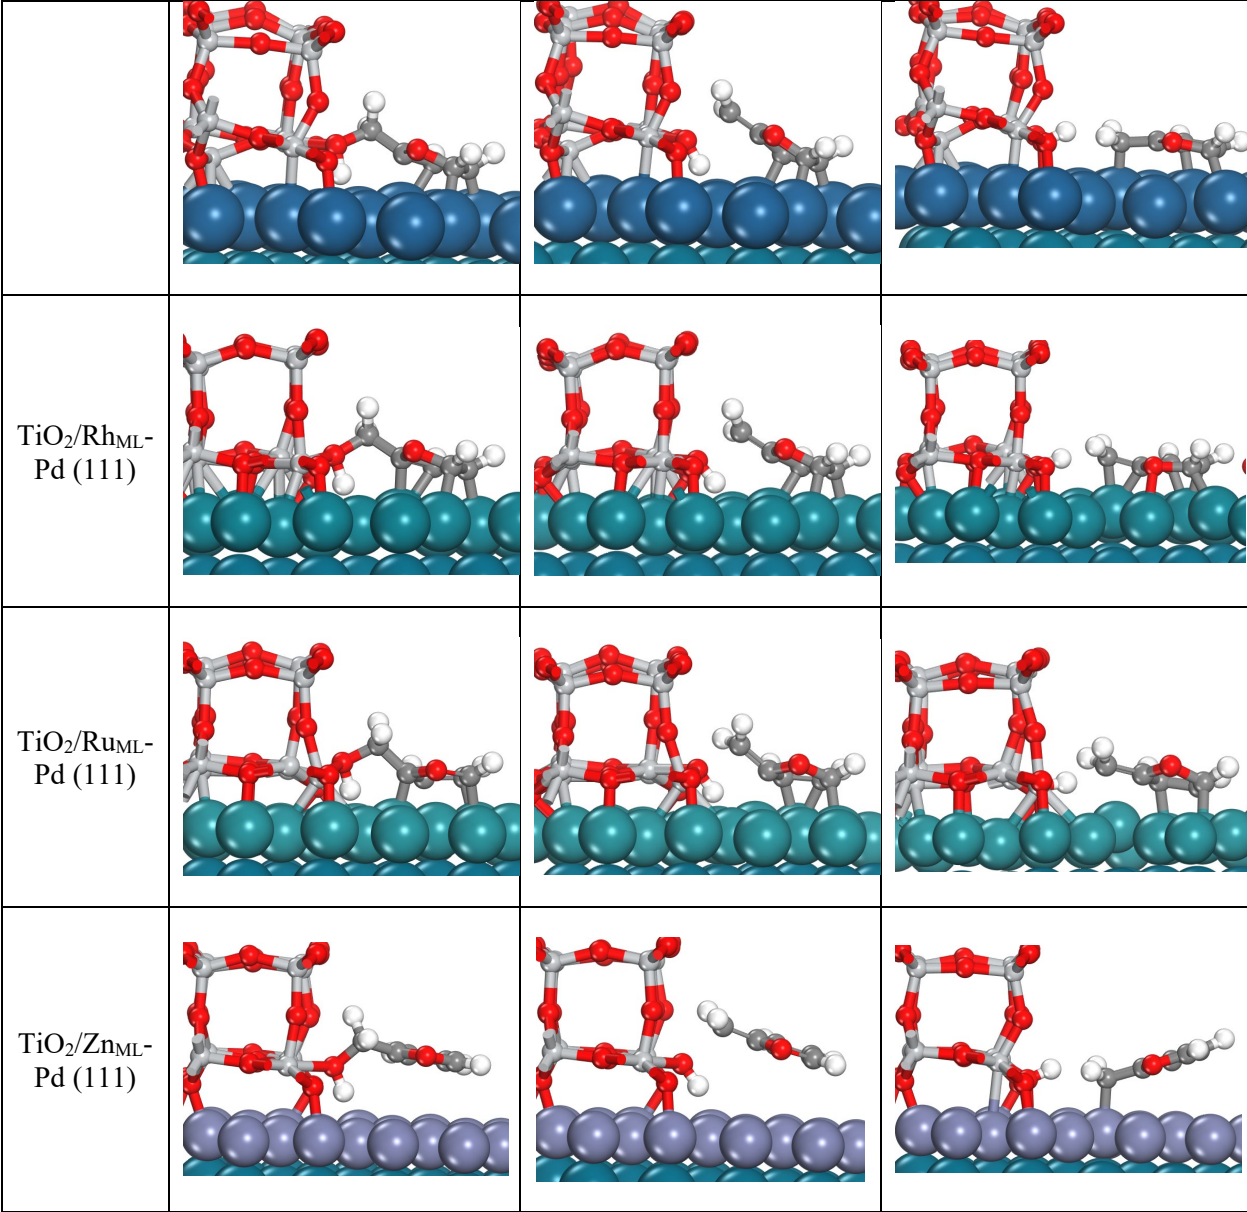

**Table S6.** Initial state (IS), transition state (TS) and final state (FS) structures for the C-H formation step across the  $\text{TiO}_2/\text{M}$  (111) and the  $\text{TiO}_2/\text{M}_{\text{ML}}\text{-Pd}$  (111) interface models. Color code: gray represents Ti, dark grey represents C, white represents H, red represents O and the fifth color shade represents the metal surface M.

| Interface Model                   | IS                                                                                  | TS                                                                                   | FS                                                                                    |
|-----------------------------------|-------------------------------------------------------------------------------------|--------------------------------------------------------------------------------------|---------------------------------------------------------------------------------------|
| $\text{TiO}_2/\text{Ag}$<br>(111) | 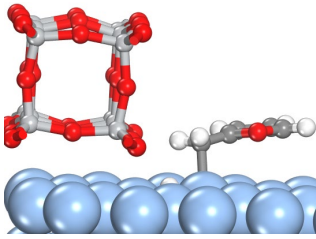   |    |    |
| $\text{TiO}_2/\text{Au}$<br>(111) |   |   |   |
| $\text{TiO}_2/\text{Cu}$<br>(111) |  |  |  |
| $\text{TiO}_2/\text{Pd}$<br>(111) |  |  |  |

|                                                          |                                                                                     |                                                                                      |                                                                                       |
|----------------------------------------------------------|-------------------------------------------------------------------------------------|--------------------------------------------------------------------------------------|---------------------------------------------------------------------------------------|
| <p>TiO<sub>2</sub>/Rh<br/>(111)</p>                      | 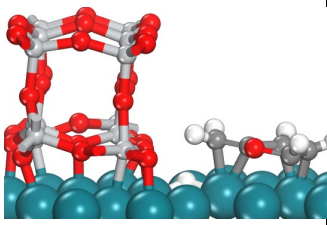   |    |    |
| <p>TiO<sub>2</sub>/Ru<br/>(111)</p>                      |    |    |    |
| <p>TiO<sub>2</sub>/Zn<br/>(111)</p>                      |   |   |   |
| <p>TiO<sub>2</sub>/Ag<sub>M</sub><br/>L-Pd<br/>(111)</p> |  |  |  |
| <p>TiO<sub>2</sub>/Au<sub>M</sub><br/>L-Pd<br/>(111)</p> |  |  |  |
| <p>TiO<sub>2</sub>/Co<sub>M</sub><br/>L-Pd<br/>(111)</p> |                                                                                     |                                                                                      |                                                                                       |



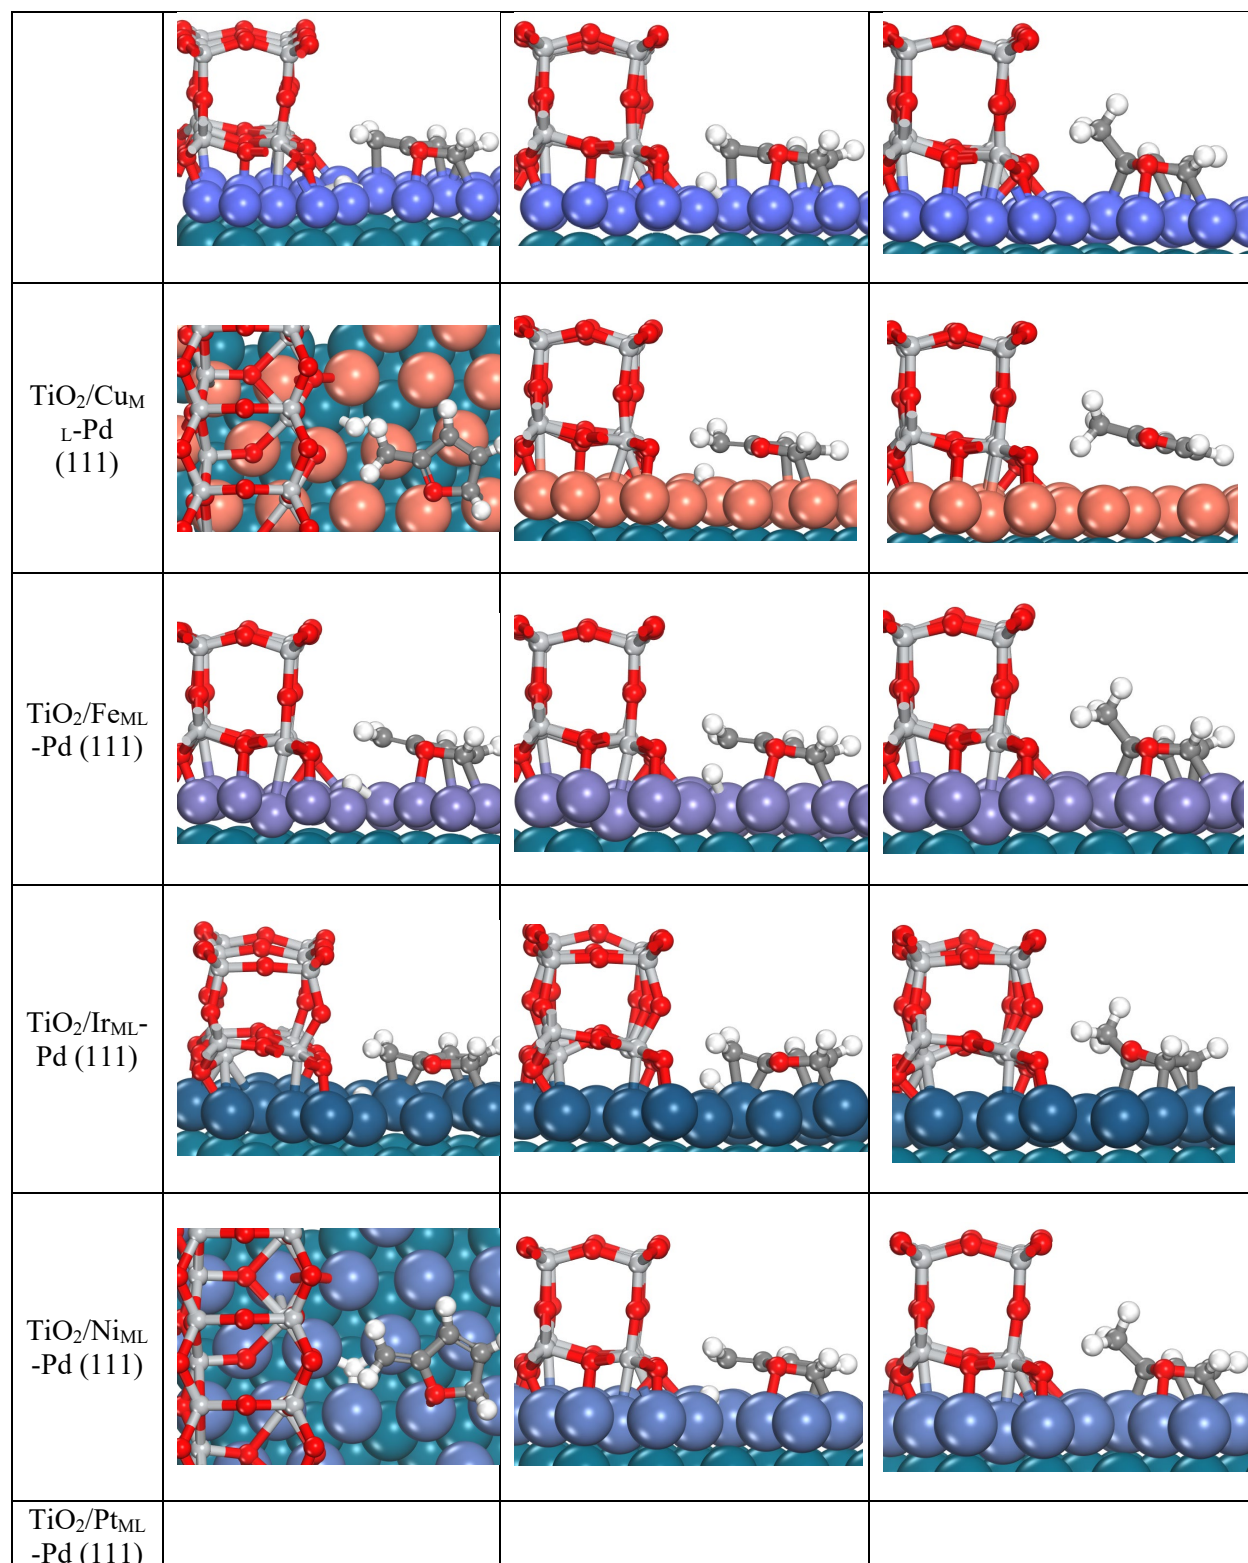

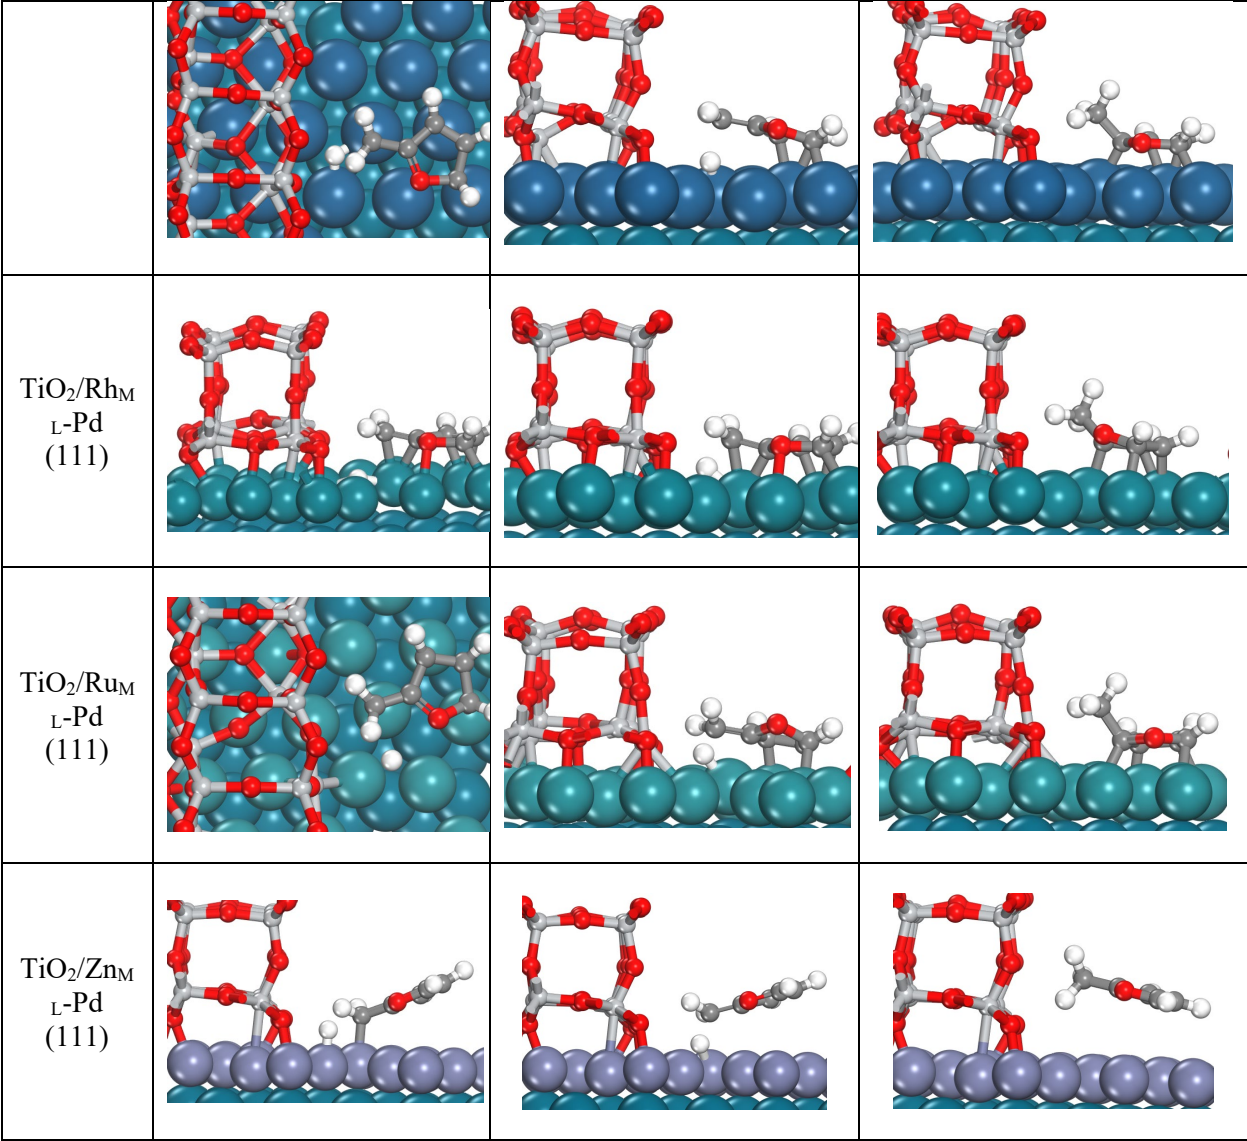



**Table S7.** The structures for H<sub>2</sub> activation/dissociative adsorption across the TiO<sub>2</sub>/M (111) and the TiO<sub>2</sub>/M<sub>ML</sub>-Pd (111) interface models. Color code: gray represents Ti, white represents H, red represents O and the fourth color shade represents the metal surface M.

| Interface Model            | Structure                                                                            |
|----------------------------|--------------------------------------------------------------------------------------|
| TiO <sub>2</sub> /Ag (111) | 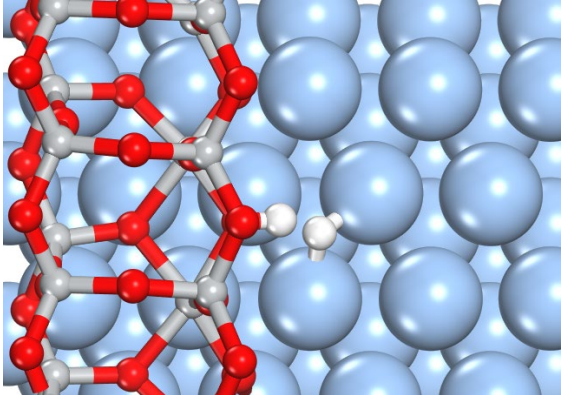   |
| TiO <sub>2</sub> /Au (111) |   |
| TiO <sub>2</sub> /Cu (111) |  |
| TiO <sub>2</sub> /Pd (111) |                                                                                      |

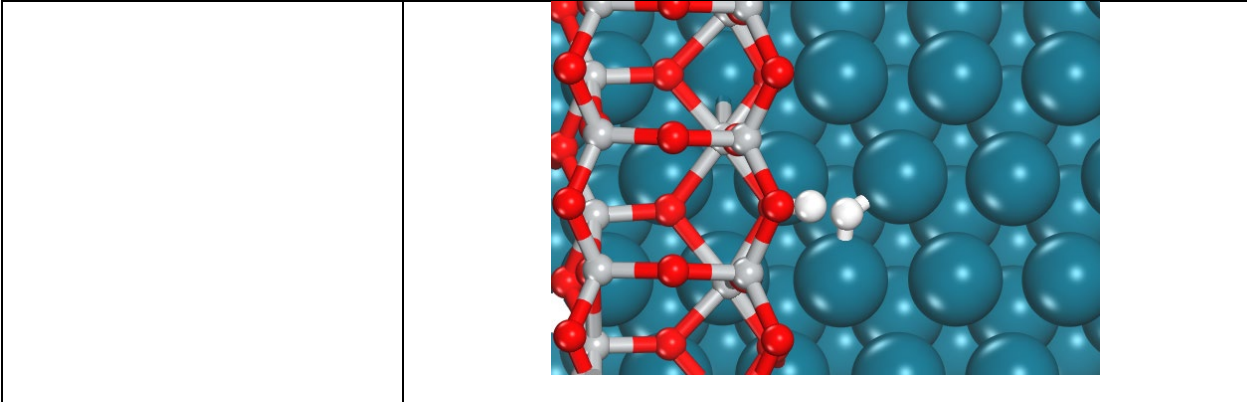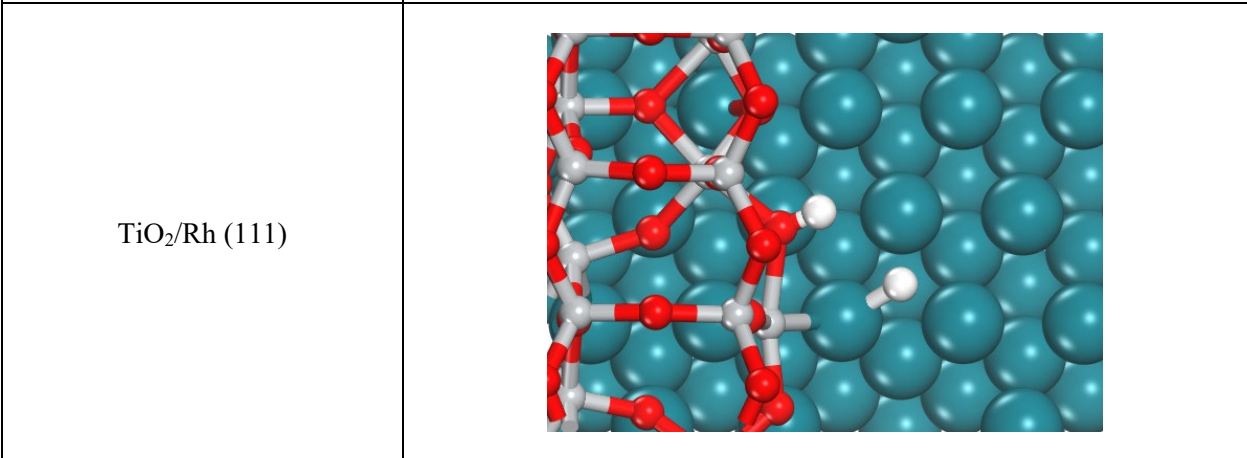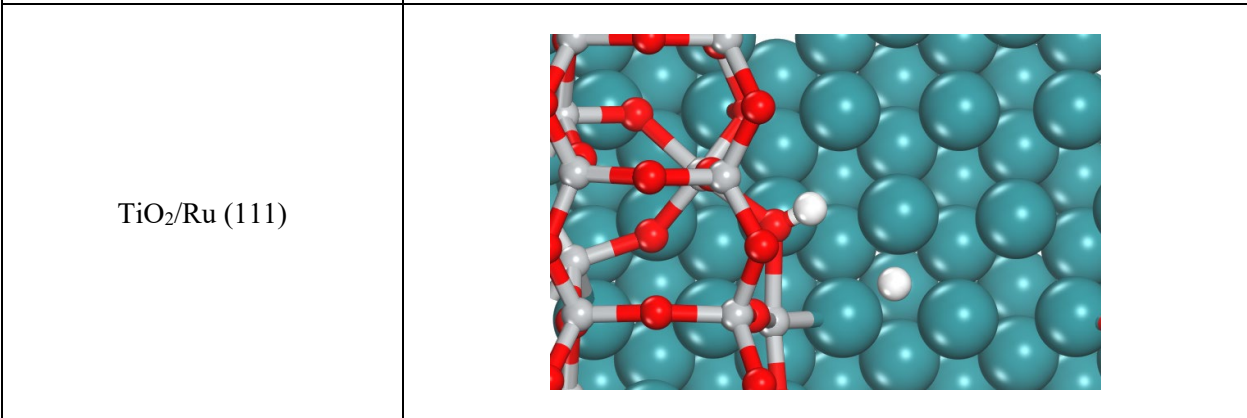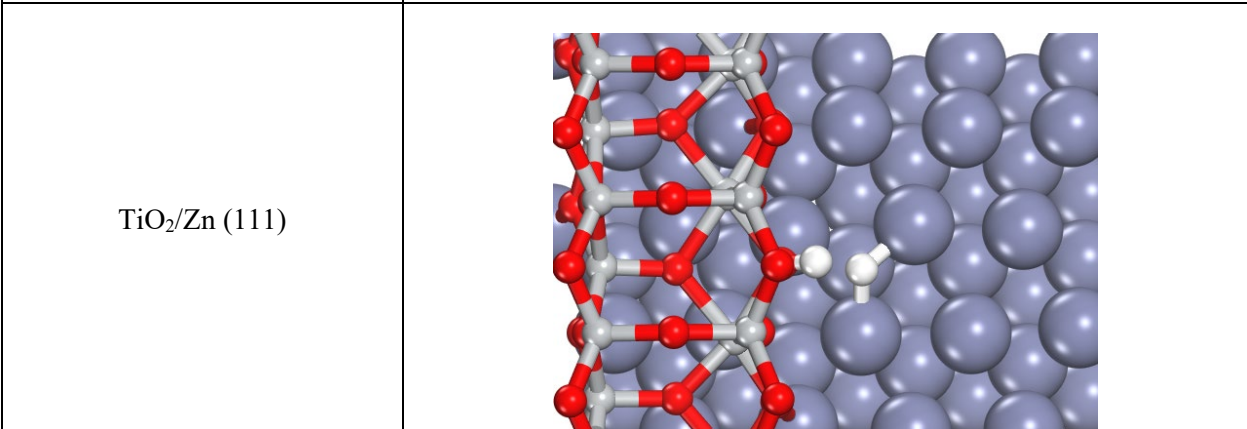

|                                                 |                                                                                                                                                                                                                                                                                                                                                                                                                                                                                                                                                     |
|-------------------------------------------------|-----------------------------------------------------------------------------------------------------------------------------------------------------------------------------------------------------------------------------------------------------------------------------------------------------------------------------------------------------------------------------------------------------------------------------------------------------------------------------------------------------------------------------------------------------|
| <p>TiO<sub>2</sub>/Ag<sub>ML</sub>-Pd (111)</p> | 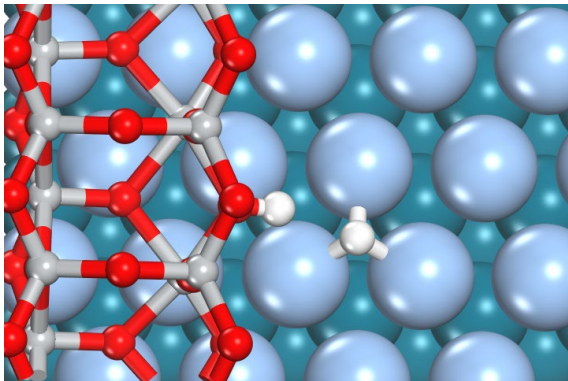 A 3D ball-and-stick model showing the interface between a TiO <sub>2</sub> layer and a monolayer of silver (Ag) on a palladium (Pd) substrate. The TiO <sub>2</sub> layer is on the left, with titanium atoms in grey and oxygen atoms in red. The Ag monolayer is on the right, with silver atoms in light blue. The Pd substrate is at the bottom, with palladium atoms in dark blue. A water molecule (H <sub>2</sub> O) is shown adsorbed on the Ag surface. |
| <p>TiO<sub>2</sub>/Au<sub>ML</sub>-Pd (111)</p> |  A 3D ball-and-stick model showing the interface between a TiO <sub>2</sub> layer and a monolayer of gold (Au) on a palladium (Pd) substrate. The TiO <sub>2</sub> layer is on the left, with titanium atoms in grey and oxygen atoms in red. The Au monolayer is on the right, with gold atoms in yellow. The Pd substrate is at the bottom, with palladium atoms in dark blue. A water molecule (H <sub>2</sub> O) is shown adsorbed on the Au surface.        |
| <p>TiO<sub>2</sub>/Co<sub>ML</sub>-Pd (111)</p> |  A 3D ball-and-stick model showing the interface between a TiO <sub>2</sub> layer and a monolayer of cobalt (Co) on a palladium (Pd) substrate. The TiO <sub>2</sub> layer is on the left, with titanium atoms in grey and oxygen atoms in red. The Co monolayer is on the right, with cobalt atoms in purple. The Pd substrate is at the bottom, with palladium atoms in dark blue. A water molecule (H <sub>2</sub> O) is shown adsorbed on the Co surface.   |
| <p>TiO<sub>2</sub>/Cu<sub>ML</sub>-Pd (111)</p> |                                                                                                                                                                                                                                                                                                                                                                                                                                                                                                                                                     |



|                                              |                                                                                                                                                                                                                                                                                                                                                                                                      |
|----------------------------------------------|------------------------------------------------------------------------------------------------------------------------------------------------------------------------------------------------------------------------------------------------------------------------------------------------------------------------------------------------------------------------------------------------------|
|                                              | 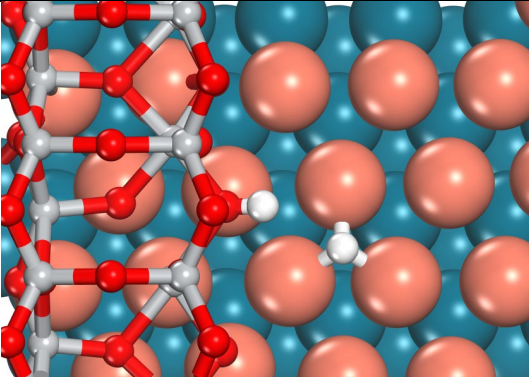 <p>A 3D ball-and-stick model showing a TiO<sub>2</sub> layer on a Pd(111) surface. The TiO<sub>2</sub> is represented by red and white spheres, and the Pd surface by blue spheres. The TiO<sub>2</sub> layer is partially adsorbed on the surface.</p>                                                           |
| TiO <sub>2</sub> /Fe <sub>ML</sub> -Pd (111) |  <p>A 3D ball-and-stick model showing a TiO<sub>2</sub> layer on a Fe<sub>ML</sub>-Pd(111) surface. The TiO<sub>2</sub> is represented by red and white spheres, the Fe monolayer by purple spheres, and the Pd surface by blue spheres. The TiO<sub>2</sub> layer is partially adsorbed on the surface.</p>      |
| TiO <sub>2</sub> /Ir <sub>ML</sub> -Pd (111) |  <p>A 3D ball-and-stick model showing a TiO<sub>2</sub> layer on an Ir<sub>ML</sub>-Pd(111) surface. The TiO<sub>2</sub> is represented by red and white spheres, the Ir monolayer by dark blue spheres, and the Pd surface by blue spheres. The TiO<sub>2</sub> layer is partially adsorbed on the surface.</p> |
| TiO <sub>2</sub> /Ni <sub>ML</sub> -Pd (111) |  <p>A 3D ball-and-stick model showing a TiO<sub>2</sub> layer on a Ni<sub>ML</sub>-Pd(111) surface. The TiO<sub>2</sub> is represented by red and white spheres, the Ni monolayer by light blue spheres, and the Pd surface by blue spheres. The TiO<sub>2</sub> layer is partially adsorbed on the surface.</p> |

|                                                 |                                                                                                                                                                                                                                                                                                                                              |
|-------------------------------------------------|----------------------------------------------------------------------------------------------------------------------------------------------------------------------------------------------------------------------------------------------------------------------------------------------------------------------------------------------|
| <p>TiO<sub>2</sub>/Pt<sub>ML</sub>-Pd (111)</p> | 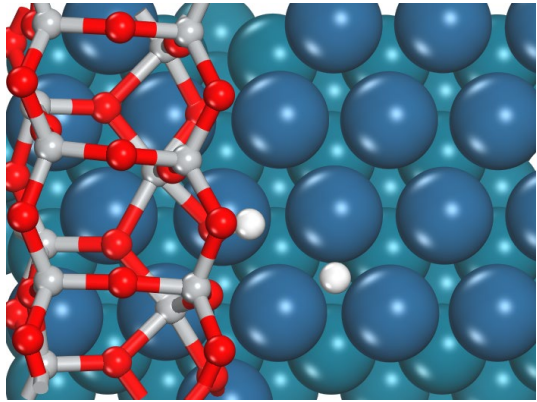 A 3D molecular model showing a TiO <sub>2</sub> layer (red and white spheres) on a Pt <sub>ML</sub> -Pd (111) surface (blue spheres). The TiO <sub>2</sub> layer is partially delocalized, with some oxygen atoms bridging between the Ti and Pd atoms.   |
| <p>TiO<sub>2</sub>/Rh<sub>ML</sub>-Pd (111)</p> |  A 3D molecular model showing a TiO <sub>2</sub> layer (red and white spheres) on a Rh <sub>ML</sub> -Pd (111) surface (teal spheres). The TiO <sub>2</sub> layer is partially delocalized, with some oxygen atoms bridging between the Ti and Rh atoms.  |
| <p>TiO<sub>2</sub>/Ru<sub>ML</sub>-Pd (111)</p> |  A 3D molecular model showing a TiO <sub>2</sub> layer (red and white spheres) on a Ru <sub>ML</sub> -Pd (111) surface (teal spheres). The TiO <sub>2</sub> layer is partially delocalized, with some oxygen atoms bridging between the Ti and Ru atoms. |
| <p>TiO<sub>2</sub>/Zn<sub>ML</sub>-Pd (111)</p> |  A 3D molecular model showing a TiO <sub>2</sub> layer (red and white spheres) on a Zn <sub>ML</sub> -Pd (111) surface (purple spheres). The TiO <sub>2</sub> layer is highly delocalized, with many oxygen atoms bridging between the Ti and Zn atoms.  |

## S10. HDO Kinetic Analysis

Derivation of rate expressions for the different kinetic regimes

**Scenario 1: Interfacial site is highly reducible, and adsorbed hydrocarbon coverage is low.**

**1a. If S2 (DDO step) is the rate determining step (RDS).**

From equation 15 we have following:

$$\text{HDO rate} = \frac{(K_1 k_2) K_3 K_4 P_{H_2} P_{FAL}}{K_3 K_4 P_{H_2} + K_1 K_3 K_4 P_{H_2} P_{FAL} + P_{FCH_3} P_{H_2 O} + K_3 P_{H_2 O}}$$

where  $\Theta_{O_{vac}}$ ,  $\Theta_{FAL-vac}$ ,  $\Theta_{FCH_2}$  and  $\Theta^*$ , represent the coverage/concentration of oxygen vacancy ( $O_{vac}^*$ ), furfuryl alcohol (FAL) adsorbed in a vacancy, organic fragment methylfuryl ( $FCH_2^*$ ), and stoichiometric  $TiO_2$  interfacial sites ( $^*$ ), respectively from steps S1-S4. These concentrations are determined by each of the four terms in the denominator of the above equation, respectively.

For S2 as the RDS, only the first two terms ( $\Theta_{O_{vac}}$  and  $\Theta_{FAL-vac}$ ) dominate. However, since we have assumed a low hydrocarbon coverage, the hydrocarbon concentrations,

$$\Theta_{FAL-vac} \ll \Theta_{O_{vac}}$$

As such, the only term left in the denominator is  $K_3 K_4 P_{H_2}$  for  $\Theta_{O_{vac}}$ . As such, equation 15 reduces to

$$\text{HDO rate} = (K_1 k_2) P_{FAL} \quad \text{Scenario 1a, 17}$$

as shown in the main paper.

**1b.** If S3 (C-H formation step) is the rate determining step (RDS).

From equation 16 we have following:

$$\mathbf{HDO\ rate} = \frac{(K_1 K_2) k_3 K_4 P_{H_2} P_{FAL}}{K_4 P_{H_2} + K_1 K_4 P_{H_2} P_{FAL} + K_1 K_2 K_4 P_{H_2} P_{FAL} + P_{H_2O}}$$

where  $\Theta_{O_{vac}}$ ,  $\Theta_{FAL-vac}$ ,  $\Theta_{FCH_2}$  and  $\Theta^*$ , represent the coverage/concentration of oxygen vacancy ( $O_{vac}^*$ ), furfuryl alcohol (FAL) adsorbed in a vacancy, organic fragment methylfuryl ( $FCH_2^*$ ), and stoichiometric  $TiO_2$  interfacial sites (\*), respectively from steps S1-S4. These concentrations are determined by each of the four terms in the denominator of the above equation, respectively.

For S3 as the RDS, only the first three terms ( $\Theta_{O_{vac}}$ ,  $\Theta_{FAL-vac}$  and  $\Theta_{FCH_2}$ ) dominate. However, since we have assumed a low hydrocarbon coverage, the terms containing hydrocarbon concentrations,

$$\Theta_{FAL-vac} \text{ and } \Theta_{FCH_2} \ll \Theta_{O_{vac}}$$

As such, the only term left in the denominator is  $K_4 P_{H_2}$ . As such, equation 15 reduces to

$$\mathbf{HDO\ rate} = (K_1 K_2) k_3 P_{FAL} \qquad \text{Scenario 1b, 18}$$

as shown in the main paper.

**Scenario 2: Interfacial surface is not highly reducible, and adsorbed hydrocarbon coverage is low.**

**2a.** If S2 (DDO step) is the rate determining step (RDS).

From equation 15 we have following:

$$\mathbf{HDO\ rate} = \frac{(K_1.k_2) K_3 K_4 P_{H_2} P_{FAL}}{K_3 K_4 P_{H_2} + K_1 K_3 K_4 P_{H_2} P_{FAL} + P_{FCH_3} P_{H_2O} + K_3 P_{H_2O}}$$

where similar to scenario 1a & 1b earlier,  $\Theta_{O_{vac}}$ ,  $\Theta_{FAL-vac}$ ,  $\Theta_{FCH_2}$  and  $\Theta^*$ , represent the coverage/concentration of oxygen vacancy ( $O_{vac}^*$ ), furfuryl alcohol (FAL) adsorbed in a vacancy, organic fragment methylfuryl ( $FCH_2^*$ ), and stoichiometric  $TiO_2$  interfacial sites ( $^*$ ), respectively from steps S1-S4. These concentrations are determined by each of the four terms in the denominator of the above equation, respectively.

With a less reducible interfacial surface, the concentration of oxygen vacancies,  $\Theta_{O_{vac}}$  would be quite low, with higher concentrations of  $\Theta^*$ . Under low hydrocarbons coverage, the middle two terms from the denominator would also vanish.

As such, the only term left in the denominator is  $K_3 P_{H_2O}$ . The equation 15, therefore, reduces to

$$\mathbf{HDO\ rate} = \frac{(K_1 k_2) K_4 P_{H_2} P_{FAL}}{P_{H_2O}} \quad \text{Scenario 2a, 19}$$

as shown in the main paper.



**2b.** If S3 (C-H formation step) is the rate determining step (RDS).

From equation 16 we have following:

$$\mathbf{HDO\ rate} = \frac{(K_1 K_2) k_3 K_4 P_{H_2} P_{FAL}}{K_4 P_{H_2} + K_1 K_4 P_{H_2} P_{FAL} + K_1 K_2 K_4 P_{H_2} P_{FAL} + P_{H_2O}}$$

where  $\Theta_{Ovac}$ ,  $\Theta_{FAL-vac}$ ,  $\Theta_{FCH_2}$  and  $\Theta^*$ , represent the coverage/concentration of oxygen vacancy ( $O_{vac}^*$ ), furfuryl alcohol (FAL) adsorbed in a vacancy, organic fragment methylfuryl ( $FCH_2^*$ ), and stoichiometric  $TiO_2$  interfacial sites (\*), respectively from steps S1-S4. These concentrations are determined by each of the four terms in the denominator of the above equation, respectively.

Similar to scenario 2a, for a less reducible interfacial surface, the concentration of oxygen vacancies,  $\Theta_{Ovac}$  (first term) would be quite low, with higher concentrations of  $\Theta^*$ . Under low hydrocarbons coverage, the middle two terms from the denominator would also vanish.

As such, the only term left in the denominator is  $P_{H_2O}$  for  $\Theta^*$ . And, then equation 16 reduces to

$$\mathbf{HDO\ rate} = \frac{(K_1 K_2 k_3) K_4 P_{H_2} P_{FAL}}{P_{H_2O}} \quad \text{Scenario 2b, 20}$$

as shown in the main paper.

### Scenario 3: Hydrocarbon coverage is high.

3a. If S2 (DDO step) is the rate determining step (RDS).

From equation 15 we have following:

$$\text{HDO rate} = \frac{(K_1 k_2) K_3 K_4 P_{H_2} P_{FAL}}{K_3 K_4 P_{H_2} + K_1 K_3 K_4 P_{H_2} P_{FAL} + P_{FCH_3} P_{H_2 O} + K_3 P_{H_2 O}}$$

where  $\Theta_{O_{vac}}$ ,  $\Theta_{FAL-vac}$ ,  $\Theta_{FCH_2}$  and  $\Theta^*$ , represent the coverage/concentration of oxygen vacancy ( $O_{vac}^*$ ), furfuryl alcohol (FAL) adsorbed in a vacancy, organic fragment methylfuryl ( $FCH_2^*$ ), and stoichiometric  $TiO_2$  interfacial sites ( $^*$ ), respectively from steps S1-S4. These concentrations are determined by each of the four terms in the denominator of the above equation, respectively.

With S2 as the RDS, only the first two terms ( $\Theta_{O_{vac}}$  and  $\Theta_{FAL-vac}$ ) dominate. Under high hydrocarbon coverage, the hydrocarbon concentrations  $\Theta_{FAL-vac} \gg \Theta_{O_{vac}}$ . As such, the only term left in the denominator is  $K_1 K_3 K_4 P_{H_2} P_{FAL}$  for this term. As such, equation 15 reduces to

$$\text{HDO rate} = k_2$$

*Scenario 3a, 21*

as shown in the main paper.

**3b.** If S3 (C-H formation step) is the rate determining step (RDS).

From equation 16:

$$\text{HDO rate} = \frac{(K_1 K_2) k_3 K_4 P_{H_2} P_{FAL}}{K_4 P_{H_2} + K_1 K_4 P_{H_2} P_{FAL} + K_1 K_2 K_4 P_{H_2} P_{FAL} + P_{H_2O}}$$

where  $\Theta_{O_{vac}}$ ,  $\Theta_{FAL-vac}$ ,  $\Theta_{FCH_2}$  and  $\Theta^*$ , represent the coverage/concentration of oxygen vacancy ( $O_{vac}^*$ ), furfuryl alcohol (FAL) adsorbed in a vacancy, organic fragment methylfuryl ( $FCH_2^*$ ), and stoichiometric  $TiO_2$  interfacial sites (\*), respectively from steps S1-S4. These concentrations are determined by each of the four terms in the denominator of the above equation, respectively.

With S3 as the RDS, only the first three terms ( $\Theta_{O_{vac}}$ ,  $\Theta_{FAL-vac}$  and  $\Theta_{FCH_2}$ ) dominate. Further, under high hydrocarbons coverage,  $\Theta_{O_{vac}} \ll \Theta_{FAL-vac}$ ,  $\Theta_{FCH_2}$ . As such, the middle two terms left in the denominator.

As such, equation 16 reduces to

$$\text{HDO rate} = \frac{(K_1 K_2) k_3 K_4 P_{H_2} P_{FAL}}{K_1 K_4 P_{H_2} P_{FAL}(1+K_2)} = \frac{K_2 k_3}{(1+K_2)} \quad \text{Scenario 3b, 22}$$

Now, if C-O bond activation energetics are also favorable, then  $K_2 \gg 1$ . Then the equation reduces to

$$\text{HDO rate} = k_3 \quad \text{Scenario 3b, 22}$$

However, if  $K_2 \ll 1$ , but C-H bond formation (S3 step) remains the RDS. Then the HDO rate reduces to  $K_2 k_3$ .
